# Supplementary material for: A new hexanuclear Fe(iii) nanocluster: synthesis, structure, magnetic properties, and efficient activity as a precatalyst in water oxidation
Source: Royal Society of Chemistry journal article supplement (doi:10.1039/d2dt01822e), 2022-01-01
Supplement: d2dt01822e1.pdf [file d2dt01822e1.pdf]

## Supporting Information

### A new hexanuclear Fe(III) nanocluster: Synthesis, structure, magnetic properties, and efficient activity as a precatalyst in water oxidation

Muhammad Nadeem Akhtar,<sup>a\*</sup> Rahman Bikas,<sup>b</sup> Murad A. AlDamen,<sup>c\*</sup> Zohreh Shaghghi,<sup>d</sup> M. Shahid,<sup>e</sup> Andrei Sokolov<sup>f</sup>

<sup>a</sup>Division of Inorganic Chemistry, Institute of Chemistry, The Islamia University of Bahawalpur, Bahawalpur 63100, Pakistan

<sup>b</sup>Department of Chemistry, Faculty of Science, Imam Khomeini International University, 34148-96818 Qazvin, Iran

<sup>c</sup>Department of Chemistry, School of Science, the University of Jordan, Amman 11942, Jordan.

<sup>d</sup>Coordination Chemistry Research Laboratory, Department of Chemistry, Faculty of Basic Sciences, Azarbaijan Shahid Madani University, 5375171379, Tabriz, Iran

<sup>e</sup>Functional Inorganic Materials Lab (FIML), Department of Chemistry, Aligarh Muslim University, Aligarh 202002, India

<sup>f</sup>Department of Physics and Astronomy, University of Nebraska-Lincoln, Lincoln, NE 68588, USA

#### Corresponding Authors

nadeemchem@yahoo.com, [m.nadeemakhtar@iub.edu.pk](mailto:m.nadeemakhtar@iub.edu.pk) (M. N. Akhtar)

[maldamen@ju.edu.jo](mailto:maldamen@ju.edu.jo) (M. A. AlDamen)

#### Contents

|                                                                                                                                                                                                                                                                                  |    |
|----------------------------------------------------------------------------------------------------------------------------------------------------------------------------------------------------------------------------------------------------------------------------------|----|
| Figure S1. Packing view of the complex, <b>1</b> .                                                                                                                                                                                                                               | 2  |
| Table S1. Crystal data and structure refinement for <b>1</b> .                                                                                                                                                                                                                   | 3  |
| Table S2. Bond lengths (Å) and angles (°) for <b>1</b> .                                                                                                                                                                                                                         | 4  |
| Figure S2. Field dependence of the magnetization for <b>1</b> at 2 (blue circles) and 5 K (green circles), red line is Brillouin function, the none filled style circle with black color is the simulated data by MagPack and the exchange model used and described in the text. | 5  |
| Figure S3. LSV curves of carbon paste electrode modified by <b>1</b> at different pH in a scan rate of 50 mV s <sup>-1</sup> .                                                                                                                                                   | 6  |
| Figure S4. CV for carbon paste electrode modified by <b>1</b> at different pH in a scan rate of 50 mV s <sup>-1</sup> .                                                                                                                                                          | 7  |
| Figure S5: Continuous CVs (first ten cycles) for the carbon paste electrode modified by <b>1</b> in a borate solution (0.5 M) at pH = 7 and scan rate of 50 mV.s <sup>-1</sup> in the range of -0.7-1.5 V vs. Ag/AgCl.                                                           | 8  |
| Figure S6: FE-SEM images of the electrode surface before water oxidation in different scales; 20 μm(a), 10 μm(b), 2 μm (c), 1 μM (d), 500 nm (e) and 200 nm (f).                                                                                                                 | 9  |
| Figure S7: SEM/EDX images showing the elemental distribution of C, O, N, S, and Fe in the electrode surface before water oxidation                                                                                                                                               | 10 |
| Figure S8: XRD pattern of the surface electrode before continuous CVs in 0.5 M of borate solution at pH=7.                                                                                                                                                                       | 11 |
| Figure S9: FT-IR spectra of the surface of the modified electrode with the Fe cluster after continuous CVs in a 0.5 M borate solution (pH=7) at the scan rate of 50 mV s <sup>-1</sup> .                                                                                         | 12 |
| Figure S10:TGA plot of the surface of the modified electrode with the Fe cluster after continuous CVs in a 0.5 M borate solution (pH=7) at the scan rate of 50 mV s <sup>-1</sup> .                                                                                              | 13 |

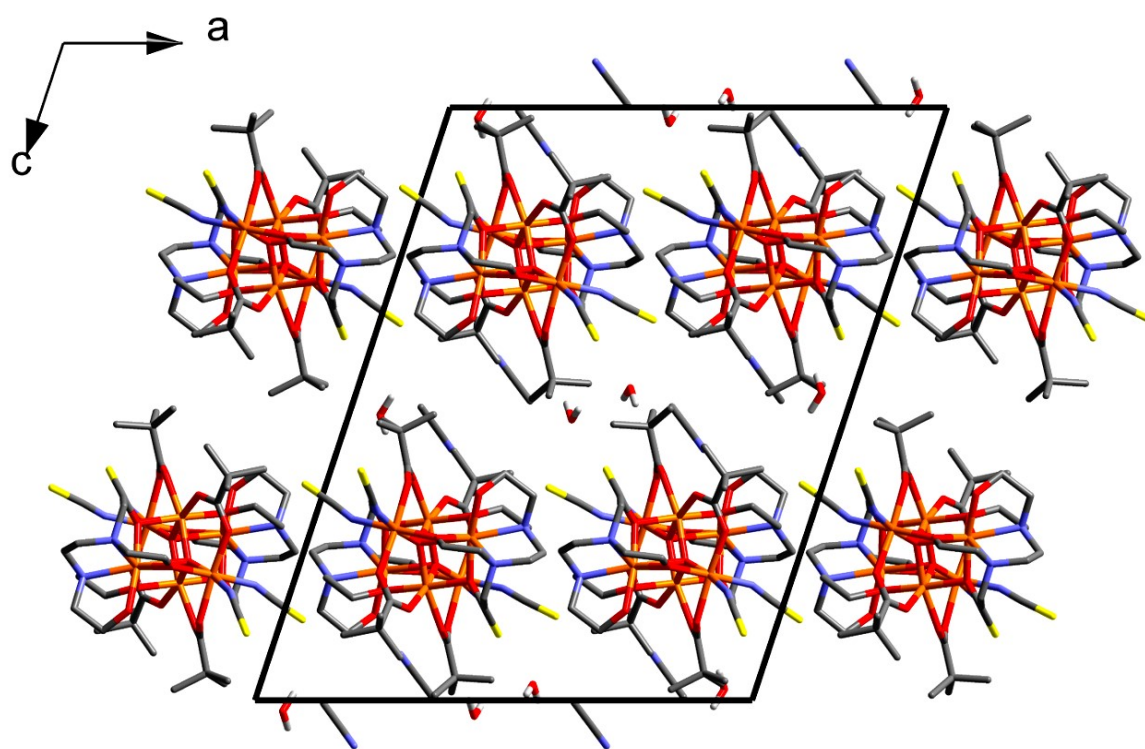

**Figure S1.** Packing view of the complex, **1**.

**Table S1.** Crystal data and structure refinement for **1**.

|                                             |                                                                                                |
|---------------------------------------------|------------------------------------------------------------------------------------------------|
| Empirical formula                           | C <sub>48</sub> H <sub>88</sub> N <sub>10</sub> O <sub>20</sub> S <sub>4</sub> Fe <sub>6</sub> |
| Formula weight                              | 1588.62                                                                                        |
| Temperature/K                               | 120(2)                                                                                         |
| Crystal system                              | monoclinic                                                                                     |
| Space group                                 | P2 <sub>1</sub> /c                                                                             |
| a/Å                                         | 20.5565(10)                                                                                    |
| b/Å                                         | 13.6140(6)                                                                                     |
| c/Å                                         | 26.1065(14)                                                                                    |
| α/°                                         | 90                                                                                             |
| β/°                                         | 107.997(2)                                                                                     |
| γ/°                                         | 90                                                                                             |
| Volume/Å <sup>3</sup>                       | 6948.6(6)                                                                                      |
| Z                                           | 4                                                                                              |
| ρ <sub>calc</sub> /cm <sup>3</sup>          | 1.519                                                                                          |
| μ/mm <sup>-1</sup>                          | 1.412                                                                                          |
| F(000)                                      | 3304.0                                                                                         |
| Crystal size/mm <sup>3</sup>                | 0.093 × 0.072 × 0.066                                                                          |
| Radiation                                   | MoKα (λ = 0.71073)                                                                             |
| 2θ range for data collection/°              | 4.396 to 50.998                                                                                |
| Index ranges                                | -24 ≤ h ≤ 24, -16 ≤ k ≤ 16, -31 ≤ l ≤ 31                                                       |
| Reflections collected                       | 92301                                                                                          |
| Independent reflections                     | 12938 [R <sub>int</sub> = 0.0840, R <sub>sigma</sub> = 0.0480]                                 |
| Data/restraints/parameters                  | 12938/28/822                                                                                   |
| Goodness-of-fit on F <sup>2</sup>           | 1.119                                                                                          |
| Final R indexes [I ≥ 2σ (I)]                | R <sub>1</sub> = 0.0564, wR <sub>2</sub> = 0.1270                                              |
| Final R indexes [all data]                  | R <sub>1</sub> = 0.0865, wR <sub>2</sub> = 0.1399                                              |
| Largest diff. peak/hole / e Å <sup>-3</sup> | 1.65/-0.93                                                                                     |

$$R_1 = \frac{\sum |F_o| - |F_c|}{\sum |F_o|} \quad wR_2 = \left\{ \frac{\sum w(F_o^2 - F_c^2)^2}{\sum [wF_o^2]^2} \right\}^{\frac{1}{2}}$$

**Table S2.** Bond lengths (Å) and bond angles (°) for **1**.

|             |            |             |            |
|-------------|------------|-------------|------------|
| Fe1-O2      | 1.956(3)   | Fe1-O1      | 1.996(3)   |
| Fe1-O4      | 2.000(4)   | Fe1-O6      | 2.023(3)   |
| Fe1-O3      | 2.028(4)   | Fe1-O5      | 2.041(3)   |
| Fe1-Fe4     | 2.9392(10) | Fe2-O1      | 1.912(3)   |
| Fe2-O17     | 1.982(4)   | Fe2-N2      | 2.042(5)   |
| Fe2-O7      | 2.060(4)   | Fe2-O8      | 2.071(4)   |
| Fe2-N1      | 2.087(5)   | Fe3-O2      | 1.921(3)   |
| Fe3-O10     | 1.982(4)   | Fe3-N3      | 2.042(5)   |
| Fe3-O11     | 2.056(4)   | Fe3-O9      | 2.068(4)   |
| Fe3-N4      | 2.072(5)   | Fe4-O1      | 1.960(3)   |
| Fe4-O2      | 1.988(4)   | Fe4-O14     | 1.994(4)   |
| Fe4-O15     | 2.021(4)   | Fe4-O12     | 2.033(4)   |
| Fe4-O13     | 2.045(3)   | Fe5-O13     | 1.964(4)   |
| Fe5-O10     | 1.980(4)   | Fe5-O6      | 2.005(4)   |
| Fe5-O16     | 2.118(4)   | Fe5-N6      | 2.244(4)   |
| Fe5-N5      | 2.270(4)   | Fe5-O2      | 2.363(3)   |
| Fe6-O5      | 1.963(4)   | Fe6-O17     | 1.982(4)   |
| Fe6-O12     | 1.992(4)   | Fe6-O18     | 2.119(4)   |
| Fe6-N7      | 2.249(4)   | Fe6-N8      | 2.278(4)   |
| Fe6-O1      | 2.362(3)   |             |            |
| Fe2-O1-Fe4  | 130.12(19) | Fe2-O1-Fe1  | 129.41(18) |
| Fe4-O1-Fe1  | 95.96(15)  | Fe2-O1-Fe6  | 96.14(14)  |
| Fe4-O1-Fe6  | 99.06(14)  | Fe1-O1-Fe6  | 95.58(14)  |
| Fe3-O2-Fe1  | 130.74(19) | Fe3-O2-Fe4  | 128.53(18) |
| Fe1-O2-Fe4  | 96.34(15)  | Fe3-O2-Fe5  | 95.66(14)  |
| Fe1-O2-Fe5  | 99.03(14)  | Fe4-O2-Fe5  | 95.90(13)  |
| Fe6-O5-Fe1  | 107.89(16) | C21-O6-Fe5  | 120.3(3)   |
| Fe5-O13-Fe4 | 107.89(16) | C36-O14-Fe4 | 134.5(4)   |
| Fe6-O17-Fe2 | 107.36(17) | C19-O18-Fe6 | 117.6(3)   |

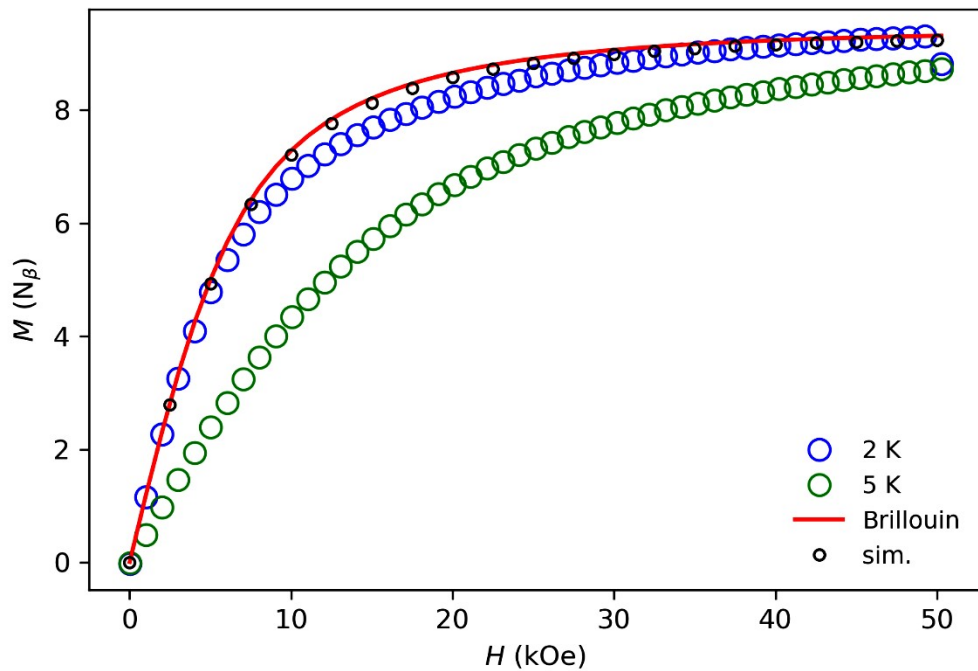

**Figure S2.** Field dependence of the magnetization for **1** at 2 (blue circles) and 5 K (green circles), red line is Brillouin function, the none filled style circle with black color is the simulated data by MagPack and the exchange model used and described in the text.

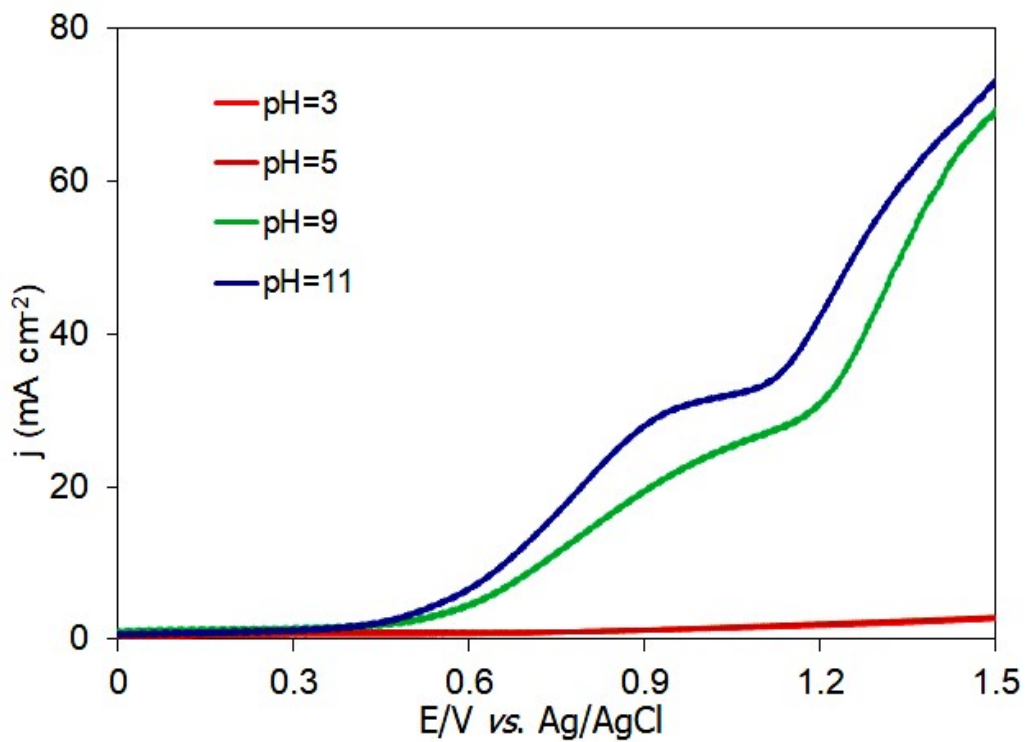

**Figure S3.** LSV curves of carbon paste electrode modified by **1** at different pH in a scan rate of 50 mV s<sup>-1</sup>.

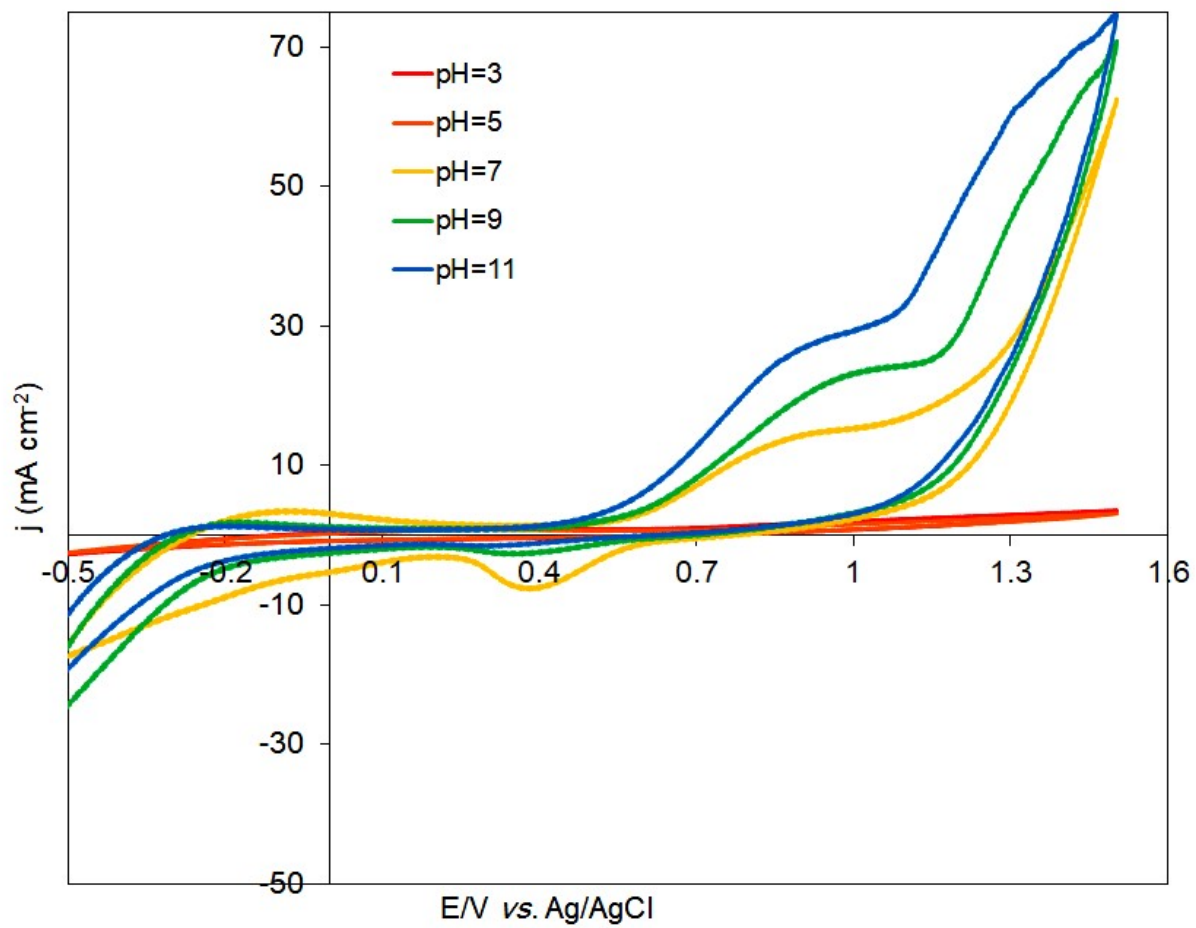

**Figure S4.** CV for carbon paste electrode modified by **1** at different pH in a scan rate of  $50 \text{ mV s}^{-1}$ .

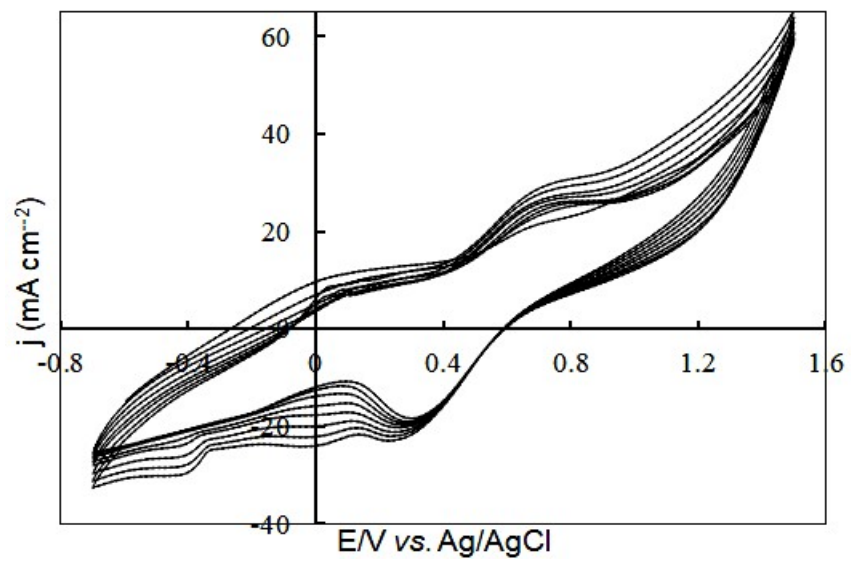

**Figure S5.** Continuous CVs (first ten cycles) for the carbon paste electrode modified by **1** in a borate solution (0.5 M) at pH = 7 and scan rate of  $50 \text{ mV}\cdot\text{s}^{-1}$  in the range of -0.7-1.5 V vs. Ag/AgCl.



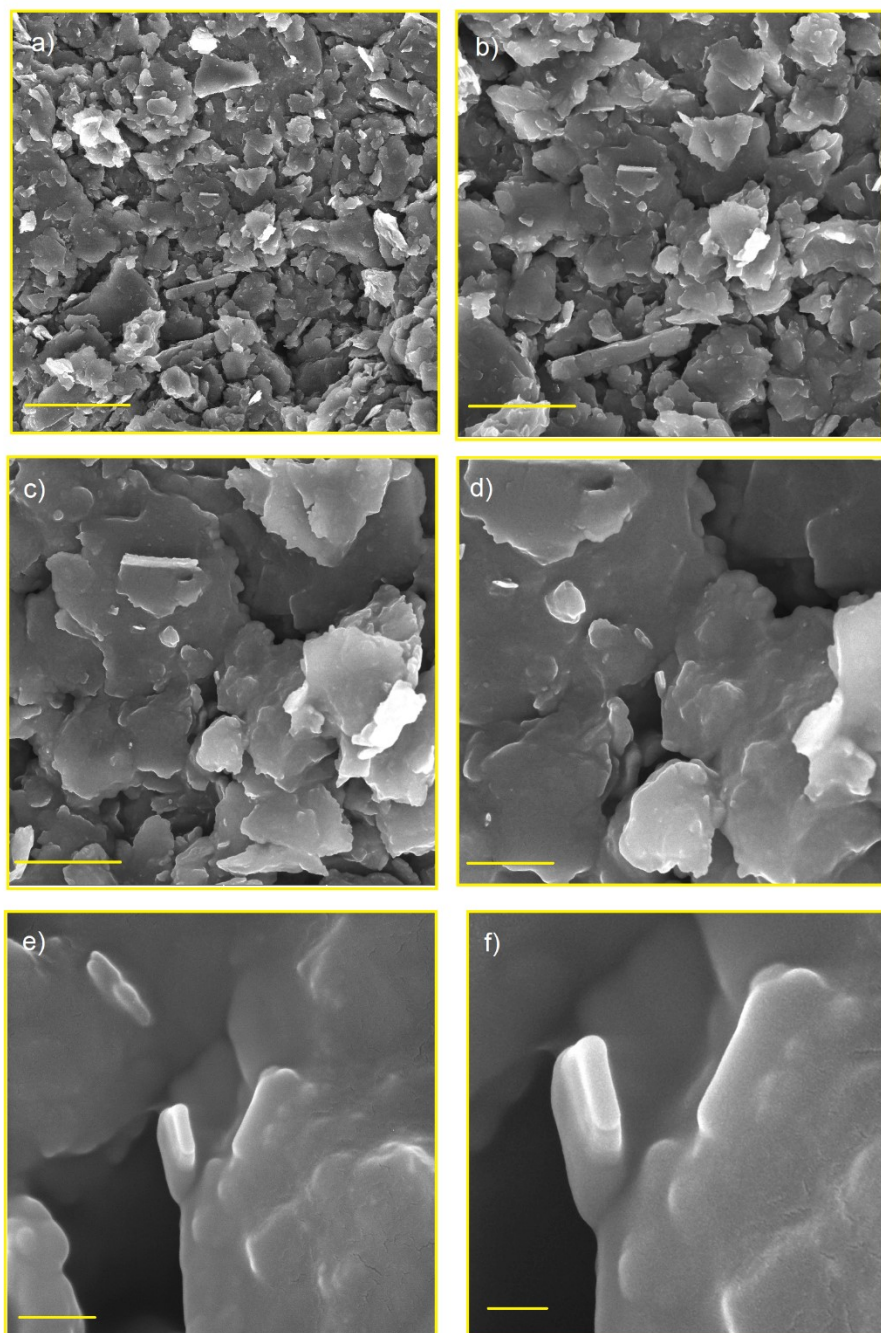

**Figure S6.** FE-SEM images of the electrode surface before water oxidation in different scales; 20  $\mu\text{m}$ (a), 10  $\mu\text{m}$ (b), 2  $\mu\text{m}$  (c), 1  $\mu\text{m}$  (d), 500 nm (e) and 200 nm (f).

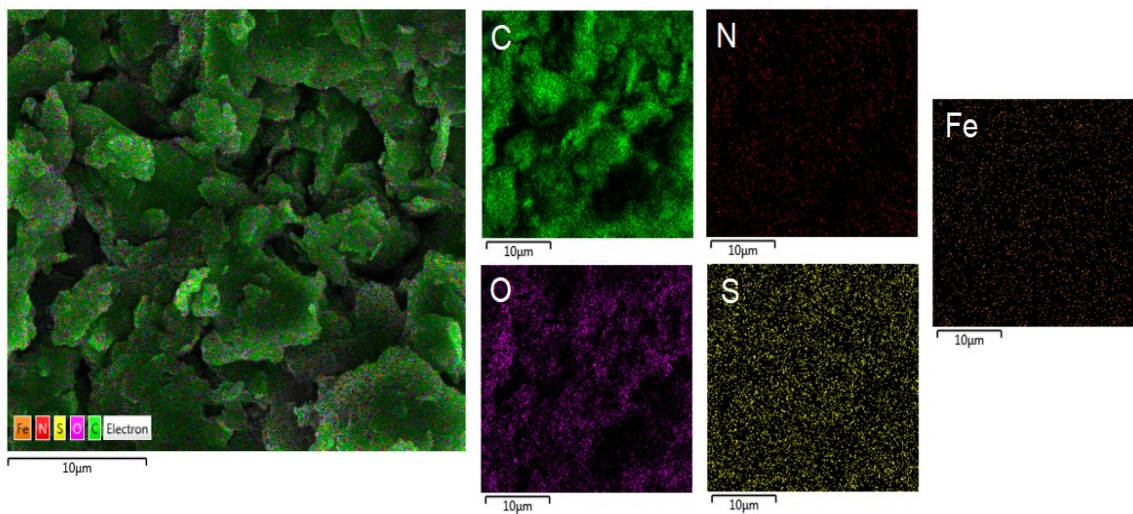

**Figure S7.** SEM/EDX images showing the elemental distribution of C, O, N, S, and Fe in the electrode surface before water oxidation

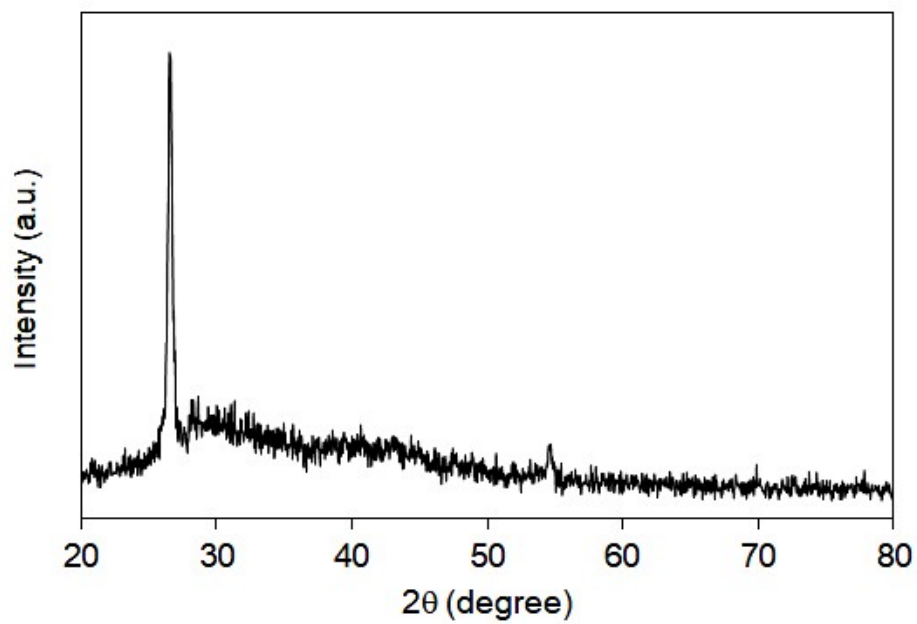

**Figure S8.** XRD pattern of the surface electrode before continuous CVs in 0.5 M of borate buffer at pH=7.

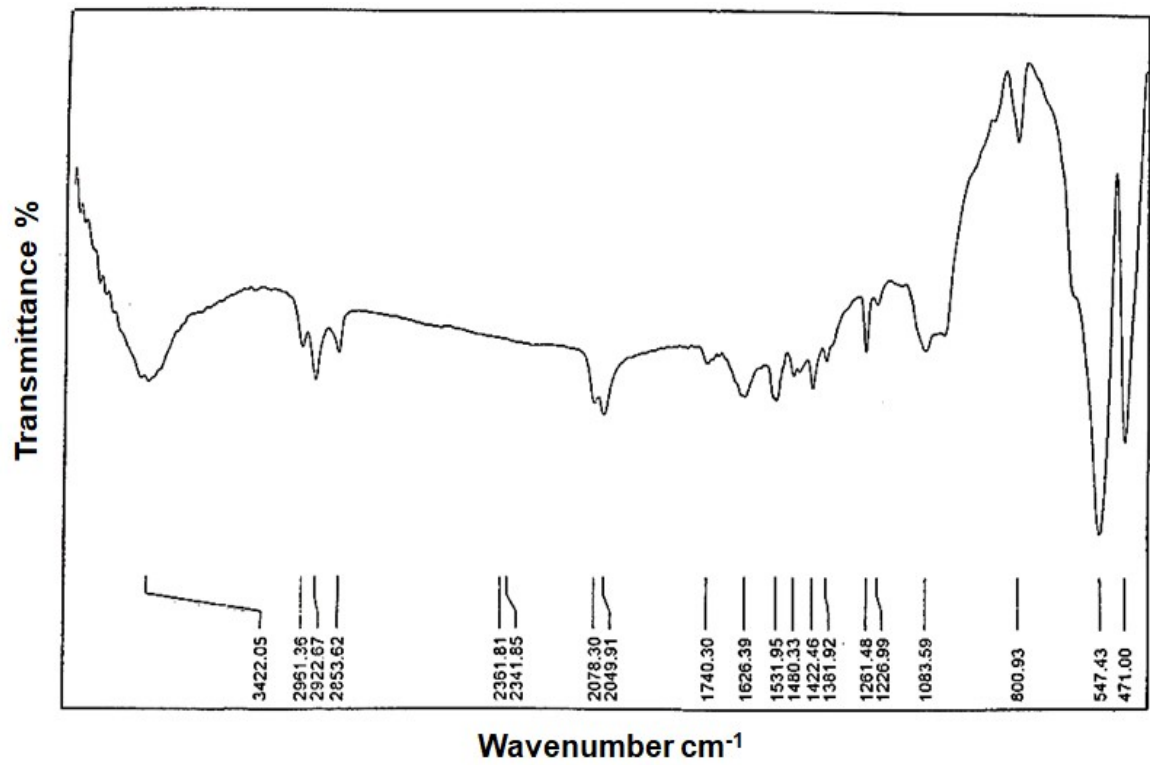

**Figure S9:** FT-IR spectra of the surface of the modified electrode with the Fe cluster after continuous CVs in a 0.5 M borate solution (pH=7) at the scan rate of 50 mV s<sup>-1</sup>.

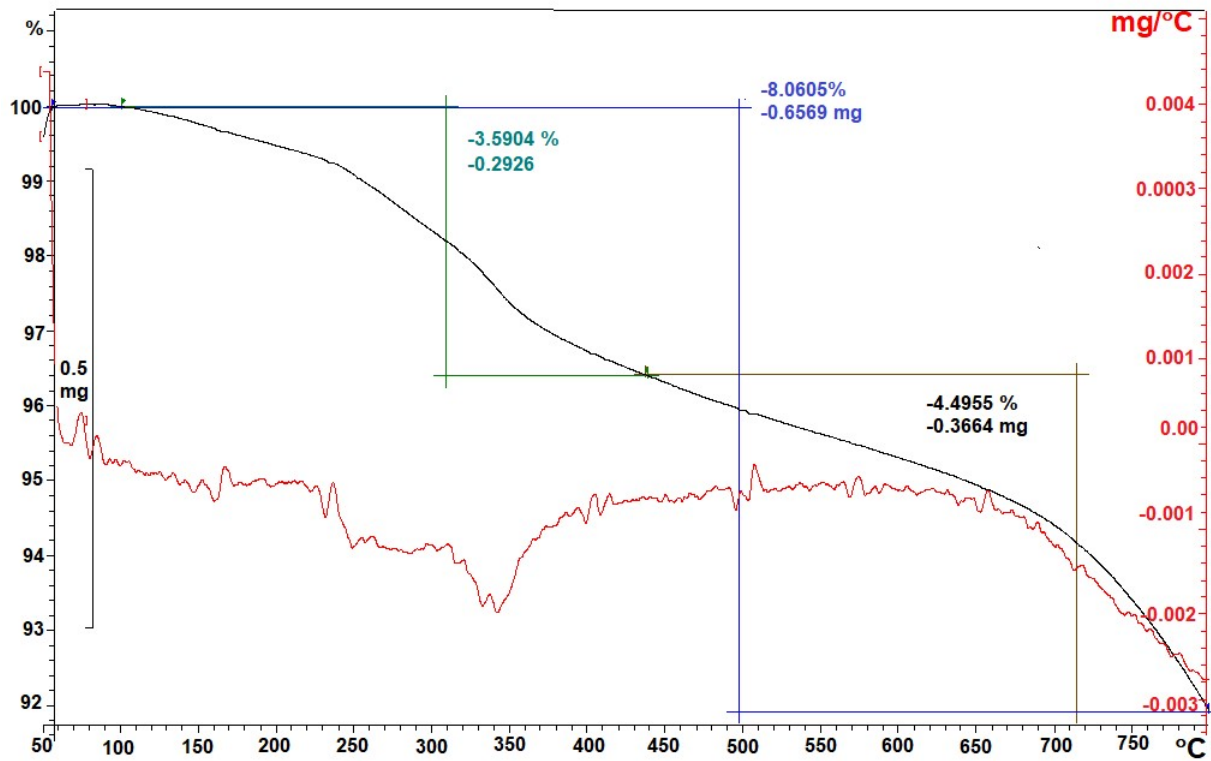

**Figure S10:** TGA plot of the surface of the modified electrode with the Fe cluster after continuous CVs in a 0.5 M borate solution (pH=7) at the scan rate of 50 mV s<sup>-1</sup>.
